# Supplementary material for: The Role of Vitamins in Oral Potentially Malignant Disorders and Oral Cancer: A Systematic Review
Source: MDPI journal article supplement (doi:10.3390/jpm13101520), 2023-10-23
Supplement: s1 [file s1]

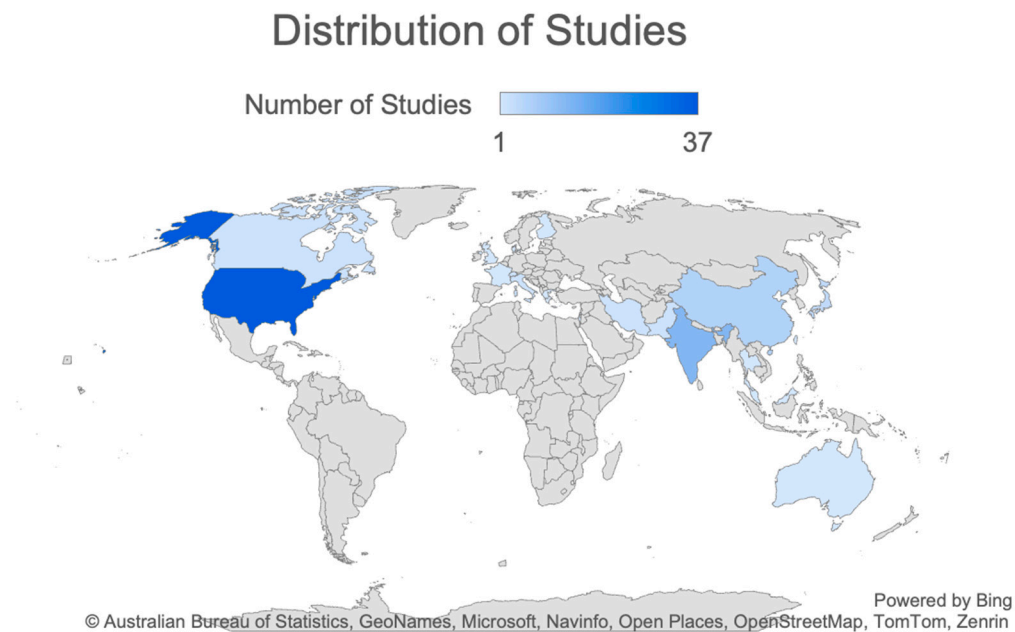

Figure S1: Geographical distribution of the studies that were included in the systematic review.

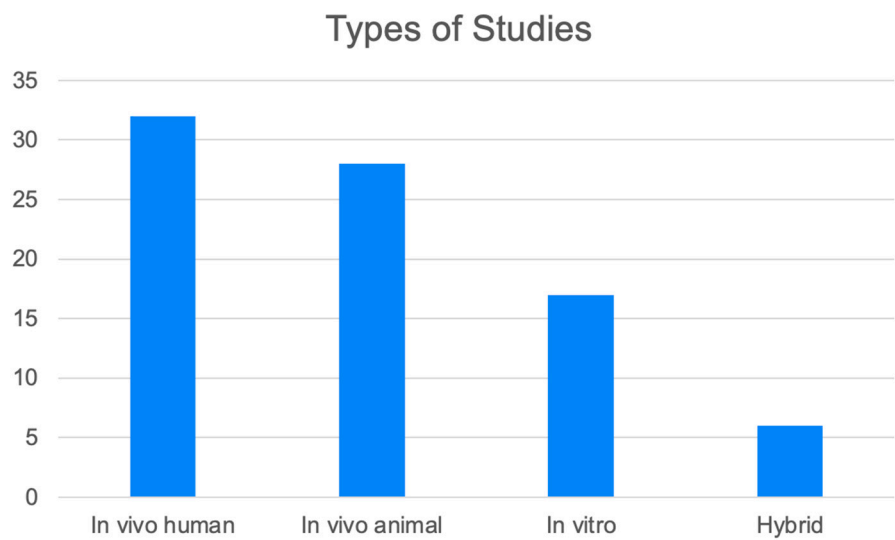

Figure S2: Distribution of the type of studies.

*Table S1: List of essential vitamins*

| <b>Vitamin</b> | <b>Synonym/related terms included in search</b>                            |
|----------------|----------------------------------------------------------------------------|
| Vitamin A      | Retinol, retinoid, retinoic acid, retinyl ester, carotenoid, beta-carotene |
| Vitamin C      | Ascorbic acid                                                              |
| Vitamin D      | Calciferol                                                                 |
| Vitamin E      | Tocopherol                                                                 |
| Vitamin K      | Phylloquinone, menaquinone, phytonadione                                   |
| Vitamin B1     | Thiamine                                                                   |
| Vitamin B2     | Riboflavin                                                                 |
| Vitamin B3     | Niacin                                                                     |
| Vitamin B5     | Pantothenic acid                                                           |
| Vitamin B6     | Pyroxidine                                                                 |
| Vitamin B7     | Biotin                                                                     |
| Vitamin B9     | Folate                                                                     |
| Vitamin B12    | Cobalamin                                                                  |

*Table S2: OPMDs based on 2020 WHO Consensus (13)*

| <b>OPMD (abbreviation)</b>                | <b>Definition</b>                                                                                                                                                                                                                                                                                                 |
|-------------------------------------------|-------------------------------------------------------------------------------------------------------------------------------------------------------------------------------------------------------------------------------------------------------------------------------------------------------------------|
| Oral leukoplakia (OL)                     | A predominantly white plaque of questionable risk having excluded other known diseases or disorders that carry no increased risk for cancer.                                                                                                                                                                      |
| Proliferative verrucous leukoplakia (PVL) | Progressive, persistent, and irreversible disorder characterised by the presence of multiple leukoplakia that frequently becomes warty.                                                                                                                                                                           |
| Erythroplakia (EL)                        | A predominantly fiery red patch that cannot be characterized clinically or pathologically as any other definable disease.                                                                                                                                                                                         |
| Palatal lesions in reverse smokers (PLRS) | White and/or red patches affecting the hard palate in reverse smokers, frequently stained with nicotine.                                                                                                                                                                                                          |
| Oral submucous fibrosis (SF)              | A chronic, insidious disease that affects the oral mucosa, initially resulting in loss of fibro-elasticity of the lamina propria and, as the disease advances, results in fibrosis of the lamina propria and the submucosa of the oral cavity along with epithelial atrophy.                                      |
| Oral lichen planus (OLP)                  | A chronic inflammatory disorder of unknown aetiology with characteristic relapses and remissions, displaying white reticular lesions, accompanied or not by atrophic, erosive, and ulcerative and/or plaque-type areas. Lesions are frequently bilaterally symmetrical. Desquamative gingivitis may be a feature. |
| Dyskeratosis congenita (DC)               | A rare cancer-prone inherited bone marrow failure syndrome caused by aberrant telomere biology. It is characterized clinically by the presence of the diagnostic triad of dysplastic nails, lacy reticular skin pigmentation, and oral leukoplakia.                                                               |
| Actinic keratosis/actinic cheilitis (AK)  | A disorder that results from sun damage and affects exposed areas of the lips, most commonly the vermilion border of the lower lip, with a variable presentation of atrophic and erosive areas and white plaques.                                                                                                 |
| Oral lupus erythematosus (OLE)            | An autoimmune connective tissue disease which may affect the lip and oral cavity, where it presents as an                                                                                                                                                                                                         |

|                                                |                                                                                                                                                                                                              |
|------------------------------------------------|--------------------------------------------------------------------------------------------------------------------------------------------------------------------------------------------------------------|
|                                                | erythematous area surrounded by whitish striae, frequently with a target configuration.                                                                                                                      |
| Oral lichenoid lesion (OLL)                    | Oral lesions with lichenoid features but lacking the typical clinical or histopathological appearances of OLP; that is, they may show asymmetry or are reactions to dental restorations or are drug-induced. |
| Oral Chronic Graft-versus-Host Disease (cGVHD) | Clinical and histopathological presentations similar to oral lichen planus in a patient developing an autoimmune, multi-organ complication after allogeneic hematopoietic cell transplantation.              |

*Table S3: Search string including all keywords and operators. ^: Search string 6 was used in Medline and EBM databases only, as the Web of Science database does not support subject heading-based search.*

| Search    | String                                                                                                                                                                                                                                                                                                                                                                                                                                                                                                                                                                                                                                                                             |
|-----------|------------------------------------------------------------------------------------------------------------------------------------------------------------------------------------------------------------------------------------------------------------------------------------------------------------------------------------------------------------------------------------------------------------------------------------------------------------------------------------------------------------------------------------------------------------------------------------------------------------------------------------------------------------------------------------|
| <b>1</b>  | ("vitamin*" OR "vitamin product*" OR "vitamin deficienc*" OR "vitamin therap*" OR "vitamin A" OR "retinol" OR "retinoid" OR "retinoic acid" OR "retinyl ester" OR "carotenoid" OR "beta-carotene" OR "ascorbic acid" OR "vitamin C" OR "vitamin D" OR "calciferol" OR "vitamin E" OR "tocopherol" OR "vitamin K" OR "phyloquinone" OR "menaquinone" OR "menadione" OR "phytonadione" OR "vitamin B" OR "B group vitamin*" OR "vitamin B1" OR "thiamine" OR "vitamin B2" OR "riboflavin" OR "vitamin B3" OR "niacin" OR "vitamin B5" OR "pantothenic acid" OR "vitamin B6" OR "pyridoxine" OR "vitamin B7" OR "biotin" OR "vitamin B9" OR "folate" OR "vitamin B12" OR "cobalamin") |
| <b>2</b>  | ("trace element*" OR "mineral*" OR "boron" OR "borate" OR "copper" OR "cobalt" OR "iodine" OR "iron" OR "manganese" OR "molybdenum" OR "zinc" OR "chlorine" OR "fluorine" OR "fluoride" OR "titanium" OR "nickel" OR "selenium" OR "vanadium" OR "bromine" OR "lithium" OR "silicon" OR "tin" OR "stannous" OR "titanium")                                                                                                                                                                                                                                                                                                                                                         |
| <b>3</b>  | ("oral" OR "mouth") adj5 ("premalignan*" OR "precancer" OR "dysplasia" OR "leukoplakia" OR "erythroplakia" OR "lichen planus" OR "submucous fibrosis" OR "lichenoid lesion*" OR "lupus erythematosus" OR "dyskeratosis congenita" OR "chronic graft-versus-host disease" OR "actinic keratosis")                                                                                                                                                                                                                                                                                                                                                                                   |
| <b>4</b>  | ("oral" OR "mouth") adj5 ("cancer" OR "malignan*" OR "neoplas*")                                                                                                                                                                                                                                                                                                                                                                                                                                                                                                                                                                                                                   |
| <b>5</b>  | ("proliferative verrucous leukoplakia" OR "palatal lesions in reverse smokers" OR "actinic cheilitis")                                                                                                                                                                                                                                                                                                                                                                                                                                                                                                                                                                             |
| <b>6^</b> | exp mouth neoplasms/ OR gingival neoplasms/ OR leukoplakia, oral/ OR lip neoplasms/ OR palatal neoplasms/ OR salivary gland neoplasms/ OR tongue neoplasms/ OR lichen planus, oral/ OR oral submucous fibrosis/                                                                                                                                                                                                                                                                                                                                                                                                                                                                    |
| <b>7</b>  | 1 OR 2                                                                                                                                                                                                                                                                                                                                                                                                                                                                                                                                                                                                                                                                             |
| <b>8</b>  | 3 OR 4 OR 5                                                                                                                                                                                                                                                                                                                                                                                                                                                                                                                                                                                                                                                                        |
| <b>9</b>  | 7 AND 8                                                                                                                                                                                                                                                                                                                                                                                                                                                                                                                                                                                                                                                                            |
| <b>10</b> | 6 AND 9                                                                                                                                                                                                                                                                                                                                                                                                                                                                                                                                                                                                                                                                            |

*Table S4: Number of articles and kappa coefficients of record screening by title/abstract.*

| Screening by Title/Abstract | Number of Articles | Kappa Coefficient |
|-----------------------------|--------------------|-------------------|
| Pilot 1                     | 30                 | 0.93              |
| Pilot 2                     | 50                 | 0.96              |
| Complete                    | 3670               | 0.96              |
| Vitamins Only               | 485                | 0.94              |

Table S5: In vivo human studies

| Author            | Year | Type  | Additional therapies | Dose     | Frequency of administration | Route of Administration | OPMD/ Cancer | Design | Sample size | Risk Factors (#Y, #N, #N/R)  | Summary                                                                                                                                                |
|-------------------|------|-------|----------------------|----------|-----------------------------|-------------------------|--------------|--------|-------------|------------------------------|--------------------------------------------------------------------------------------------------------------------------------------------------------|
| Bacci et al.      | 2017 | Vit E | N/A                  | N/R      | 3/day                       | Topical                 | OLP          | RCT    | 33          | Smoking (1Y)                 | Topical tocopherol proved effective in reducing the dimension of OLP lesions but does not decrease discomfort.                                         |
| Benner et al.     | 1993 | Vit E | N/A                  | 400 IU   | 2/day                       | Topical                 | OL           | CT     | 43          | N/A                          | Administration of alpha-tocopherol resulted in both clinical and histologic responses in premalignant leukoplakia lesions.                             |
| Buajeeb et al.    | 2008 | Vit A | N/A                  | 15 mg    | Single dose                 | Oral                    | OLP          | CT     | 20          | N/A                          | Beta-carotene supplementation significantly reduced micronucleated exfoliated cell frequency in atrophic and erosive OLP, and reduced severity of OLP. |
| Chitra et al.     | 2008 | Vit E | Radiotherapy         | 400 IU   | 1/day                       | N/R                     | OC           | CT     | 78          | N/R                          | Glycoconjugate markers of malignant transformation were significantly decreased with Vit E supplementation.                                            |
| Delavarian et al. | 2021 | Vit D | N/A                  | 50000 IU | 1/week                      | Oral                    | OLP          | RCT    | 28          | Smoking (3Y)                 | The severity of the lesions and the levels of IL-6 and TNF- $\alpha$ were reduced in the patients treated with Vit D.                                  |
| Dhariwal et al.   | 2010 | Vit A | Zinc                 | 25000 IU | 1/day                       | Oral                    | SF           | CR     | 1           | Areca nut (1Y), smoking (1Y) | Vit A and zinc acetate significantly increased mouth opening and epithelial thickness, and decreased the collagen content of lesions.                  |

|                |      |                           |                                                   |                      |       |               |     |     |     |                                                                                     |                                                                                                                                                                                                                 |
|----------------|------|---------------------------|---------------------------------------------------|----------------------|-------|---------------|-----|-----|-----|-------------------------------------------------------------------------------------|-----------------------------------------------------------------------------------------------------------------------------------------------------------------------------------------------------------------|
| Epstein et al. | 1999 | Vit A                     | N/A                                               | 0.05%<br>or<br>0.01% | 4/day | Topical       | OL  | CR  | 26  | Tobacco use (13Y),<br>alcohol use (7Y)                                              | Approximately 27% of patients had complete clinical remission; recurrence was observed in approximately 40% of patients; 50% decrease in clinical grade of leukoplakia without change in mean histologic grade. |
| Garewal et al. | 1999 | Vit A                     | N/A                                               | 60 mg                | 1/day | Oral          | OL  | RCT | 50  | Alcohol (N/R),<br>smoking (N/R)                                                     | Beta-carotene was able to decrease leukoplakic lesions observed by decreased thickness of lesions.                                                                                                              |
| Garewal et al. | 1990 | Vit A                     | N/A                                               | 30 mg                | 1/day | Oral          | OL  | CT  | 24  | Alcohol and smoking (9Y), alcohol only (7Y), smoking only (4Y)                      | Beta-carotene is effective in reversing oral leukoplakia and is well tolerated without any major side effects.                                                                                                  |
| Gunther et al. | 1973 | Vit A                     | N/A                                               | 30 mg,<br>0.1%       | 1/day | Oral, topical | OLP | CT  | 12  | N/R                                                                                 | Discrete and confluent leukoplakia-like papules showed regression after 2-7 weeks after oral administration of Vit A.                                                                                           |
| Gupta et al.   | 2019 | Vit D                     | Psychological counselling, topical steroids (N/E) | N/E                  | N/R   | Oral          | OLP | PiS | 106 | Stress only (30Y), Vit D deficiency (46Y), stress and severe Vit D deficiency (30Y) | Reduction of burning sensation and improvement in objective morphological severity with Vit D supplementation.                                                                                                  |
| Johnson et al. | 1963 | Vit A                     | N/A                                               | 50,000 IU            | 1/day | Oral          | OL  | RCT | 40  | N/R                                                                                 | Reduction in size of lesions and histological improvements in lesions treated with Vit A.                                                                                                                       |
| Jolly et al.   | 1977 | Vit A,<br>Vit B,<br>Vit C | N/A                                               | N/R                  | N/R   | N/R           | OLP | CT  | 71  | N/R                                                                                 | Complete remission of lesions within 2 months was not seen.                                                                                                                                                     |
| Liede et al.   | 1998 | Vit A,<br>Vit E           | N/A                                               | 20 mg,<br>50 mg      | 1/day | Oral          | OL  | CT  | 343 | Smoking (343Y)                                                                      | No evidence to support an effect of cellular beta-carotene concentration on precancerous lesions.                                                                                                               |

|                |      |                                   |                    |                     |       |                         |     |     |     |                                                                   |                                                                                                                                                                                           |
|----------------|------|-----------------------------------|--------------------|---------------------|-------|-------------------------|-----|-----|-----|-------------------------------------------------------------------|-------------------------------------------------------------------------------------------------------------------------------------------------------------------------------------------|
| Lin et al.     | 2011 | Vit B                             | Levamisole         | 1 mg/cc             | N/E   | Intramuscular injection | OLP | CT  | 812 | N/R                                                               | Gastric parietal cell antibody-positive patients treated with Vit B12 had a reduction in pain or burning sensation caused by the lesion, and healing of the erosive or ulcerative lesion. |
| Lippman et al. | 1993 | Vit A                             | N/A                | 30 mg               | 1/day | N/R                     | OL  | CT  | 53  | Alcohol and smoking (31Y), alcohol only (45Y), smoking only (39Y) | Beta-carotene had greater numbers of patients with relapse, and poorer response during maintenance therapy.                                                                               |
| Maher et al.   | 1997 | Vit A, Vit B, Vit C, Vit D, Vit E | Minerals           | N/E                 | 1/day | Oral                    | SF  | CCS | 117 | Smoking (13Y)                                                     | Beneficial clinical response to SF with multiple micronutrient intervention.                                                                                                              |
| Malaker et al. | 1991 | Vit A                             | Cis-retinoic acid  | 30 mg               | N/R   | N/R                     | DYS | PiS | 18  | Smoking (11Y)                                                     | Vit A was able to improve clinical symptoms of mucosal dysplasia such as burning mouth syndrome.                                                                                          |
| Manas et al.   | 2022 | Vit E                             | Lycopene, Selenium | 400 IU              | 2/day | Oral                    | OL  | CSS | 52  | N/R                                                               | Vit E significantly reduces the size of oral leukoplakia lesions and the degree of dysplasia.                                                                                             |
| Mayne et al.   | 2001 | Vit A                             | N/A                | 50 mg               | 1/day | Oral                    | OC  | RCT | 264 | Smoking (244Y)                                                    | No statistically significant evidence found that beta-carotene supplement improved chances of secondary recurrence of head/neck/oral cancer.                                              |
| Nagao et al.   | 2015 | Vit A, Vit C                      | N/A                | 10 mg, 500 mg, 50mg | 1/day | Oral                    | OL  | RCT | 46  | Alcohol (18Y)                                                     | One year supplementation with low-dose beta-carotene and Vit C was not significantly effective for clinical remission of OL or to prevent the development of cancer.                      |
| Nazeer et al.  | 2020 | Vit D                             | N/A                | 60000 IU            | N/R   | Topical                 | OLP | CCS | 450 | N/A                                                               | Vit D supplementation decreased lesion size after treatment.                                                                                                                              |

|                          |      |              |                                                             |                   |        |         |    |     |     |                              |                                                                                                                                                                                                        |
|--------------------------|------|--------------|-------------------------------------------------------------|-------------------|--------|---------|----|-----|-----|------------------------------|--------------------------------------------------------------------------------------------------------------------------------------------------------------------------------------------------------|
| Nilesh et al.            | 2021 | Vit A, Vit E | Lycopene, selenium, zinc sulfate, copper, alpha-lipoic acid | 10mg, 10IU        | 2/day  | Oral    | SF | CT  | 46  | Areca nut (N/R)              | Multidrug therapy was effective in improving burning sensation symptoms and mouth opening in SF patients.                                                                                              |
| Ong et al.               | 1982 | Vit A        | N/A                                                         | N/E               | N/E    | N/A     | OC | CCS | 6   | N/R                          | Vit A increased retinoic acid-binding protein expression in oral cancer cells.                                                                                                                         |
| Razi et al.              | 2016 | Vit E        | Betonil                                                     | 0.5 mL            | 2/day  | Topical | SF | RCT | 76  | Betel nut (76Y)              | Vit E with corticosteroid is more effective than corticosteroid alone at relieving burning sensation (pain) and improving trismus.                                                                     |
| Sankarana rayanan et al. | 1997 | Vit A        | N/A                                                         | 300000 IU, 360 mg | 1/week | Oral    | OL | RCT | 160 | Alcohol (72Y), smoking (41Y) | Vit A had a higher percentage of complete regression of OL lesions.                                                                                                                                    |
| Silverman et al.         | 1963 | Vit A        | N/A                                                         | 75000 U           | 10/day | Topical | OL | CT  | 19  | N/R                          | Vit A results in complete/partial remission of OL in most patients.                                                                                                                                    |
| Silverman et al.         | 1965 | Vit A        | N/A                                                         | 75000 U           | 8/day  | Oral    | OL | CT  | 6   | N/R                          | Varying Vit A supplementation response ranged from complete to no remission of oral leukoplakia; similarly variable response to histological change.                                                   |
| Stich et al.             | 1988 | Vit A        | N/A                                                         | 100 000 IU        | 2/week | Oral    | OL | CT  | 130 | Betel nut (130Y)             | Frequency of micronucleated cells was reduced, leukoplakia lesions regressed, and development of new lesions inhibited.                                                                                |
| Stich et al.             | 1988 | Vit A        | N/A                                                         | 0.14 mg/kg        | 1/day  | Oral    | OL | CT  | 65  | Betel nut (65Y)              | The development of new oral leukoplakias was inhibited, and remission of established leukoplakias was induced by the 6-month oral administration of Vit A at a dose of 0.14 mg/kg body weight per day. |

|              |      |       |              |                  |        |      |             |     |     |                                                       |                                                                                                                         |
|--------------|------|-------|--------------|------------------|--------|------|-------------|-----|-----|-------------------------------------------------------|-------------------------------------------------------------------------------------------------------------------------|
| Smith        | 1962 | Vit A | N/A          | 75000-300000 USP | 1/day  | Oral | OL          | CT  | 417 | Tobacco chewing and snuff (102Y),                     | Early hyperkeratotic lesions showed most improvement; some had achieved complete resolution with Vit A supplementation. |
| Toma et al.  | 1992 | Vit A | N/A          | 90 mg            | 1/day  | Oral | OL          | CT  | 18  | Alcohol and smoking (12Y), alcohol (2Y), smoking (1Y) | Beta-carotene has "fair efficacy" against OL.                                                                           |
| Toma et al.  | 2003 | Vit A | Radiotherapy | 75 mg            | 1/day  | Oral | OC          | RCT | 214 | N/A                                                   | No statistically significant different effect of Vit A on recurrence and death rate.                                    |
| Varma et al. | 2007 | Vit A | N/A          | 1 IU             | 2/week | Oral | OL, SF, OLP | CT  | 24  | N/R                                                   | Vit A was beneficial in protecting the pre-malignant cases from p53 mutation and bcl2 expression.                       |



Table S6: In vivo animal studies

| Author           | Year | Vitamin | Additional therapies | Dose     | Frequency of administration | Route of Administration   | OPMD/ Cancer | Type    | Strain         | Summary                                                                                                                                                                            |
|------------------|------|---------|----------------------|----------|-----------------------------|---------------------------|--------------|---------|----------------|------------------------------------------------------------------------------------------------------------------------------------------------------------------------------------|
| Bothwell et al.  | 2015 | Vit D   | Erlotinib            | 0.1 µg   | 3/day                       | N/R                       | OC           | Mice    | SCID           | Significant reduction in the degree of dysplasia and suppressed tumour growth with combination treatment of active form of Vit D and erlotinib.                                    |
| Calhoun et al.   | 1989 | Vit E   | 13-cis-retinoic acid | 2 drops  | Single dose                 | Oral                      | OC           | Hamster | Golden         | Reduced ornithine decarboxylase increase upon DMBA insult in early response (8-48 hours); Vit E pre-treatment decreased ornithine carboxylase levels in late response (3-12 days). |
| Ge et al.        | 2020 | Vit D   | N/A                  | 20 nM    | 7/week                      | Intraperitoneal injection | OLP          | Mice    | C57BL/6        | Vit D/Vit D receptor signalling accelerates miR-27a/b, non-coding RNAs that regulate inflammatory response, expression in OLP.                                                     |
| Gijare et al.    | 1990 | Vit A   | Snuff                | 5,000 IU | 2/week                      | Intraperitoneal injection | OC           | Hamster | Golden         | Both beta-carotene and retinoic acid showed a total inhibition of DMBA-induced carcinogenesis in the hamster cheek pouch model.                                                    |
| Harada et al.    | 1987 | Vit C   | N/A                  | 1%       | N/R                         | Oral                      | OL           | Hamster | Golden         | Incidence of leukoplakic lesions was lower in Vit C supplemented hamsters than those without Vit C.                                                                                |
| Huang et al.     | 2019 | Vit D   | Cisplatin            | 30 µg/kg | Single dose                 | Intraperitoneal injection | OC           | Mice    | BALB/c         | No significant effect on OSCC cell death rate, but when combined with cisplatin, increased cell death in vitro and in vivo (animal).                                               |
| Kandarkar et al. | 1991 | Vit C   | N/A                  | 15 mg    | 3/week                      | Topical                   | OC           | Rat     | Sprague Dawley | Mice treated with topical Vit C showed delayed progression.                                                                                                                        |
| Kandarkar et al. | 1990 | Vit A   | N/A                  | N/E      | N/R                         | N/R                       | OC           | Hamster | Golden         | Decreased progression of lesion size and dysplastic changes with supplementation.                                                                                                  |

|                 |      |              |               |                 |        |                           |        |         |         |                                                                                                                                                                                                 |
|-----------------|------|--------------|---------------|-----------------|--------|---------------------------|--------|---------|---------|-------------------------------------------------------------------------------------------------------------------------------------------------------------------------------------------------|
| Meier et al.    | 2007 | Vit D        | N/A           | 0.25 µg/kg      | 3/week | Intraperitoneal injection | OC     | Hamster | Golden  | Vit D delays carcinogenesis.                                                                                                                                                                    |
| Odukoya et al.  | 1984 | Vit E        | N/A           | 47.5 mg         | 3/week | Topical                   | OL, OC | Hamster | Golden  | Vit E slowed tumour formation, and tumours were smaller and fewer with better cellular differentiation and less invasion.                                                                       |
| Polliack et al. | 1971 | Vit A        | N/A           | 1.7 million IU  | 3/week | Topical                   | OL     | Hamster | Golden  | Vit A caused leukoplakia to progress to squamous cell carcinoma in the hamster buccal pouch model.                                                                                              |
| Potdar et al.   | 1992 | Vit C        | DMBA          | 500 µg          | N/A    | Topical                   | OC     | Hamster | Golden  | Vit C was able to restrict growth and invasion of carcinomas into sub-epithelium.                                                                                                               |
| Rowe et al.     | 1959 | Vit A        | N/A           | 400 IU          | 2/week | Oral                      | OC     | Hamster | Golden  | Vit A deficiency promotes epithelial tumour production in carcinogen-treated cheek pouch.                                                                                                       |
| Rubin et al.    | 1973 | Vit D        | N/A           | 1.6 mg          | 3/week | Topical                   | OC     | Hamster | Golden  | Vit D (D2 and D3) reduced incidence of DMBA-induced tumorigenesis.                                                                                                                              |
| Salley et al.   | 1962 | Vit B        | N/A           | 0.400 mg/100 gm | 1/day  | N/R                       | OC     | Hamster | Pee-Dee | Latent period for tumor induction was significantly shortened in the group maintained on a low-thiamine diet.                                                                                   |
| Sawant et al.   | 2000 | Vit C, Vit E | N/A           | 50 µg           | 3/week | Topical                   | OC     | Hamster | Golden  | Vit C and E, and in combination, delay tumour induction, reduce the size and number of tumours, inhibit cell proliferation, restrict progression and invasion, and appear to prevent dysplasia. |
| Schwartz et al. | 1990 | Vit A        | N/A           | N/A             | N/R    | Topical                   | OC     | Hamster | Golden  | Beta-carotene administration resulted in prevention, inhibition, and regression of OSCC in the hamster tumour model.                                                                            |
| Schwartz et al. | 1988 | Vit A        | Canthaxanthin | 250 µg          | 2/week | Submucosal injection      | OC     | Hamster | Golden  | A significant regression of established epidermoid carcinomas of hamster buccal pouch was effected by the local injection of beta-carotene and canthaxanthin but not by 13-cis-retinoic acid.   |
| Schwartz et al. | 1993 | Vit C        | N/A           | 1 mg            | 3/week | Oral                      | OC     | Hamster | Golden  | Vit C had significantly larger tumours and the number of gross tumours were slightly increased in the hamster buccal pouch model.                                                               |

|                     |      |       |     |                          |        |                      |    |         |        |                                                                                                                                                                                                                |
|---------------------|------|-------|-----|--------------------------|--------|----------------------|----|---------|--------|----------------------------------------------------------------------------------------------------------------------------------------------------------------------------------------------------------------|
| Schwartz et al.     | 1989 | Vit A | N/A | 350 µg                   | 2/week | Submucosal injection | OC | Hamster | Golden | Cyanobacteria extract and beta-carotene significantly increased rate of gross reduction of tumour.                                                                                                             |
| Schwartz et al.     | 1986 | Vit A | N/A | N/E                      | 2/week | Topical              | OC | Hamster | Golden | Topical and subcutaneous injection of beta-carotene significantly reduced lesion count.                                                                                                                        |
| Shklar              | 1982 | Vit E | N/A | 10 mg                    | 2/week | Topical              | OC | Hamster | Golden | Inhibition of oral mucosal carcinogenesis in hamsters by injection of Vit E1.                                                                                                                                  |
| Shklar et al.       | 1987 | Vit E | N/A | 250 µg                   | 2/week | Submucosal injection | OC | Hamster | Golden | Regression of established, chemically induced tumours was effected by local injection of Vit E.                                                                                                                |
| Suda et al.         | 1987 | Vit A | N/A | 25 mg/kg                 | 3/week | Topical              | OC | Hamster | Golden | Animals that received beta-carotene treatment had lower number of tumours, reduced size of tumours, and more well-differentiated cancer cells which were less invasive.                                        |
| Suda et al.         | 1986 | Vit A | N/A | 0.62 mg, 190 ng/ml       | 3/week | Topical              | OC | Hamster | Golden | Animals that received beta-carotene treatment had lower number of tumours, reduced size of tumours, and more well-differentiated cancer cells which were less invasive; beta-carotene offered chemoprotection. |
| Tanaka et al.       | 1994 | Vit A | N/A | 500 ppm                  | N/R    | Oral (diet)          | OC | Rat     | F344   | Beta-carotene in the diet inhibited rat oral carcinogenesis that was initiated with 4-nitroquinoline 1-oxide.                                                                                                  |
| Trickler et al.     | 1987 | Vit E | N/A | 10mg                     | 2/week | Oral                 | OC | Hamster | Golden | Vit E prevented carcinogenic action in the hamster buccal pouch model.                                                                                                                                         |
| Verma et al.        | 2020 | Vit D | N/A | 25 IU, 100 IU, 10 000 IU | N/R    | Oral                 | OC | Mice    | C57BL  | High-grade dysplasia and OSCC was lower in mice on 100 IU vitamin D diets; mice on the 10 000 IU showed highest incidence of OSCC                                                                              |
| Weerapradist et al. | 1982 | Vit E | N/A | 7 IU                     | 2/week | Oral                 | OC | Hamster | Golden | Vit E is capable of delaying tumour formation or retarding carcinogenesis.                                                                                                                                     |

Table S7: In vitro studies

| Author           | Year | Vitamin | Additional therapies                 | Dose                | Frequency of administration | Route of Administration   | OPMD/ Cancer | Cell type | Cell name            | Summary                                                                                                                                                                        |
|------------------|------|---------|--------------------------------------|---------------------|-----------------------------|---------------------------|--------------|-----------|----------------------|--------------------------------------------------------------------------------------------------------------------------------------------------------------------------------|
| Abe et al.       | 1998 | Vit D   | N/A                                  | 10 <sup>-7</sup> M  | Single dose                 | N/A                       | OC           | Cancer    | HSC-3 cells          | Vit D and 9-cis-retinoic acid suppressed parathyroid hormone-related protein production and its mRNA expression in the human OSCC cell line.                                   |
| Dalirsani et al. | 2012 | Vit D   | 5-fluorouracil, 13-cis retinoic acid | 10 µmol and 20 µmol | Single dose                 | N/A                       | OC           | Cancer    | C152                 | Vitamin D decreases SCC proliferation.                                                                                                                                         |
| Elattar et al.   | 1999 | Vit E   | N/A                                  | 0.001-154 µmol/L    | N/R                         | N/A                       | OC           | Cancer    | N/A                  | Physiological concentrations of Vit E succinate (VES) enhanced cell growth (0.001-50 µmol/L); pharmacological concentrations of VES inhibited cell growth (100 and 154 µmol/L) |
| Ge et al.        | 2020 | Vit D   | N/A                                  | 300 ng/kg           | 7/week                      | Intraperitoneal injection | OLP          | Hybrid    | Oral epithelial cell | Vit D/Vit D receptor signalling accelerates miR-27a/b, non-coding RNAs that regulate inflammatory response, expression in OLP.                                                 |
| Ge et al.        | 2022 | Vit D   | N/A                                  | 20 nM               | Single dose                 | N/A                       | OLP          | Hybrid    | Oral epithelial cell | Vit D lowers STING (Stimulator of interferon genes) and IFNβ overexpression in OLP.                                                                                            |
| Huang et al.     | 2019 | Vit D   | Cisplatin                            | 30 nM               | Single dose                 | N/A                       | OC           | Cancer    | CAL-27 SCC-9         | No significant effect on OSCC cell death rate, but when combined with cisplatin, increased cell death in vitro and in vivo (animal).                                           |
| Jin et al.       | 2020 | Vit D   | N/A                                  | 30 nM               | Single dose                 | N/A                       | OC           | Cancer    | N/A                  | Vit D inhibited OSCC growth.                                                                                                                                                   |

|                 |      |              |                               |                                         |             |                        |    |        |                            |                                                                                                                                                                                         |
|-----------------|------|--------------|-------------------------------|-----------------------------------------|-------------|------------------------|----|--------|----------------------------|-----------------------------------------------------------------------------------------------------------------------------------------------------------------------------------------|
| Kingsley et al. | 2013 | Vit D        | Genistein, Daidzein Glycitein | 10 nmol, 50 nmol, 150 nmol              | Single dose | N/A                    | OC | Cancer | CAL-27, SCC-25             | Increased concentration of Vit D3 results in more robust inhibition of SCC proliferation, and coadministration of Vit D3 and soy isoflavones further enhances their anti-tumour effect. |
| Liede et al.    | 1998 | Vit A, Vit E | N/A                           | N/A                                     | N/A         | Oral                   | OL | Hybrid | N/A                        | No evidence to support an effect of cellular beta-carotene concentration on precancerous lesions.                                                                                       |
| McCabe et al.   | 2010 | Vit B        | N/A                           | 0, 10, 50, 100, 200, 400 and 1000 µg/mL | Single dose | N/A                    | OC | Cancer | CAL27, SCC25               | Vit B9 increased OSCC proliferation (dose-dependent).                                                                                                                                   |
| Moody et al.    | 2012 | Vit B        | N/A                           | N/E                                     | N/E         | N/A                    | OC | Cancer | CAL27, SCC15, SCC25, HGF-1 | Antimetabolites of Vit B can be alternative treatments for resistant tumours.                                                                                                           |
| Odukoya et al.  | 1986 | Vit E        | N/A                           | 0.1, 1, 10, 100 µM                      | 1/5 days    | N/A                    | OC | Cancer | HCPC-1                     | Vit E at low doses increased OSCC growth (max at 10 µM); at high doses it decreased growth (100 µM).                                                                                    |
| Okayasu et al.  | 2001 | Vit K        | N/A                           | N/E                                     | Single dose | N/A                    | OC | Cancer | HSC-2, HSG, HL-60, HGF     | Vit K3 is a more cytotoxic and more efficient O <sub>2</sub> scavenger than Vit K1 and K2.                                                                                              |
| Ong et al.      | 1982 | Vit A        | N/A                           | N/E                                     | N/E         | N/A                    | OC | Cancer | N/A                        | Vit A increased retinoic acid-binding protein expression in oral cancer cells.                                                                                                          |
| Schwartz et al. | 1989 | Vit A        | N/A                           | 2-60 µg/mL                              | Single dose | N/A                    | OC | Cancer | HCPC-1                     | Cyanobacteria extract and beta-carotene reversed peritoneal exudate cell cytotoxicity to HCPC-1 tumour cells.                                                                           |
| Schwartz et al. | 1986 | Vit A        | N/A                           | N/E                                     | N/A         | Subcutaneous injection | OC | Cancer | HCPC-1                     | Tumour necrosis-positive macrophages from animals treated with beta-carotene were upregulated.                                                                                          |
| Sundaram et al. | 2014 | Vit D        | N/A                           | 10 <sup>-8</sup> M                      | Single dose | N/A                    | OC | Cancer | SCC1, SCC11B, SCC14a       | Vit D analogues could be potential therapeutic agents to control OSCC tumour progression.                                                                                               |

|                 |      |       |                                          |                  |             |     |        |                   |              |                                                                                                                                                                                                                               |
|-----------------|------|-------|------------------------------------------|------------------|-------------|-----|--------|-------------------|--------------|-------------------------------------------------------------------------------------------------------------------------------------------------------------------------------------------------------------------------------|
| Suresh et al.   | 2013 | Vit K | N/A                                      | 1-100 µM         | Single dose | N/A | OC     | Cancer            | SAS          | Vit K3 is more cytotoxic to oral cancer cells but not non-tumorigenic cells, while also exhibiting anti-neoplastic and antimigratory effects, effectively blocking epithelial to mesenchymal transition in oral cancer cells. |
| Toma et al.     | 1991 | Vit A | N/A                                      | 10 µM            | Single dose | N/A | OL, OC | Dysplasia, cancer | KB, SCC-25   | Beta-carotene was able to reduce clonogenic activity, even if it does not seem to influence cell proliferation, and it has a protective effect against genotoxic damage.                                                      |
| Zhao et al.     | 2018 | Vit D | N/A                                      | N/E              | Single dose | N/A | OLP    | Dysplastic        | HaCat cells  | Vit D/Vit D receptor plays a protective role, stopping or delaying OLP development.                                                                                                                                           |
| Zhang et al.    | 2007 | Vit E | 13-cis-retinoic acid, interferon-alpha2A | 15 µM            | Single dose | N/A | OC     | Cancer            | SQCCY1       | Combination treatment of 13-cis-retinoic acid, interferon-alpha2A and alpha-tocopherol (Vit E) had a cooperative inhibitory effect on the growth of oral cancer cells.                                                        |
| Zhao et al.     | 2019 | Vit D | N/A                                      | 20nM             | Single dose | N/A | OLP    | Dysplastic        | N/A          | Vit D/Vit D receptor signalling suppressed miR-802 expression in LPS-treated or activated CD4+ T cell-stimulated human oral keratinocytes by blocking NF-kB pathways inhibiting OLP apoptosis.                                |
| Zulkapli et al. | 2017 | Vit E | Cisplatin                                | 2.5 ± 0.42 µg/mL | N/R         | N/R | OC     | Cancer            | ORL-48 cells | Alpha-Tocopherol was reported effective in enhancing the tumour growth inhibition activity of cisplatin.                                                                                                                      |

*Table S8: OHAT risk of bias assessment criteria*

Selection Bias:

- Was administered dose or exposure level adequately randomized?
- Was allocation to study groups adequately concealed?

Performance Bias:

- Were experimental conditions identical across study groups?
- Were the research personnel and human subjects blinded to the study group during the study?

Attrition/Exclusion Bias:

- Were outcome data complete without attrition or exclusion from analysis?

Detection Bias:

- Can we be confident in the exposure characterization?
- Can we be confident in the outcome assessment?

Selective Reporting Bias:

- Were all measured outcomes reported?
